# Supplementary material for: PNPLA3 is a triglyceride lipase that mobilizes polyunsaturated fatty acids to facilitate hepatic secretion of large-sized very low-density lipoprotein
Source: PubMed Central journal article supplement (PMC11156938; doi:10.1038/s41467-024-49224-x), 2024-06-06
Supplement: 41467_2024_49224_MOESM1_ESM.pdf [file 41467_2024_49224_MOESM1_ESM.pdf]

## Supplementary Information

### Supplementary Figure 1. PNPLA3 degrades PUFA-LDs in primary mouse hepatocytes

**(a-d)** Primary Hepatocytes were isolated from 10-week-old WT mice and infected with adenovirus expressing Flag-PNPLA3 WT (a-b) or I148M (c-d). Cells were treated overnight with 250  $\mu$ M OA (a,c) or LA (b,d). Scale Bar = 10 $\mu$ m. Images shown were derived from representative experiments that were repeated three times.

**Supplementary Figure 2. Design and validation of PNPLA3 LKO mice. (a-b)** Diagram (Biorender) of the PNPLA3 locus of PNPLA3<sup>fl/fl</sup> mice in the absence **(a)** or presence **(b)** of Cre recombinase. **(c-d)** PNPLA3 mRNA expression of PNPLA3<sup>fl/fl</sup> mice infected with AAV-TBG-null (n=6) or AAV-TBG-CRE (n=6) in brown **(c)** and white **(d)** adipose tissue. No significant difference was detected using t test.

**Supplementary Figure 3. PNPLA3 knockdown does not affect liver or plasma lipid content in the absence of lipogenic stimulation.** 10-week-old WT mice were fed COWD and treated with control (n=8) or PNPLA3 ASO (n=7) biweekly for 3 weeks. **(a)** Liver PNPLA3 mRNA expression. **(b)** Total liver TG content. **(c)** Total plasma TG content. \*\*\*p<0.001, ns= p>0.05, t test.

**Supplementary Figure 4. Histology and gene expression of PNPLA3 knockdown livers upon LXR agonism.** 10-week-old WT mice fed COWD were treated with control or PNPLA3 ASO for 3 weeks. Both groups were treated with the LXR agonist T0901317 prior to tissue collection (n=7/group). **(a-b)** Hematoxylin and eosin (H&E) staining of liver sections from Control ASO **(a)** or PNPLA3 ASO **(b)** treated mice. **(c)** Liver mRNA expression of lipogenic genes by qPCR. **(d)** Liver mRNA expression of ER stress response genes by qPCR. \*\*\*p<0.001, \*\*\*\*p<0.0001, t test.

**Supplementary Figure 5. LD degradation by endogenous PNPLA3 in primary mouse hepatocytes requires high glucose lipogenic culture conditions.** BODIPY staining of LDs in primary mouse hepatocytes treated with Control **(top)** or PNPLA3 **(bottom)**ASO. Cells were loaded with 250 $\mu$ M OA **(left)** or LA **(right)** in low glucose medium overnight. Scale Bar= 50 $\mu$ m. Images shown were derived from representative experiments that were repeated three times.

**Supplementary Figure 6. Model of PNPLA3 function during lipogenesis.** Lipogenic stimulation drives PNPLA3 expression, resulting in PUFA mobilization from TG for desaturation of membrane- and VLDL-PLs. PNPLA3 deficiency from knockout or I148M mutation impairs PL desaturation and VLDL lipidation, leading to hepatic retention of TG and steatosis. Schematic model was created by using Biorender.

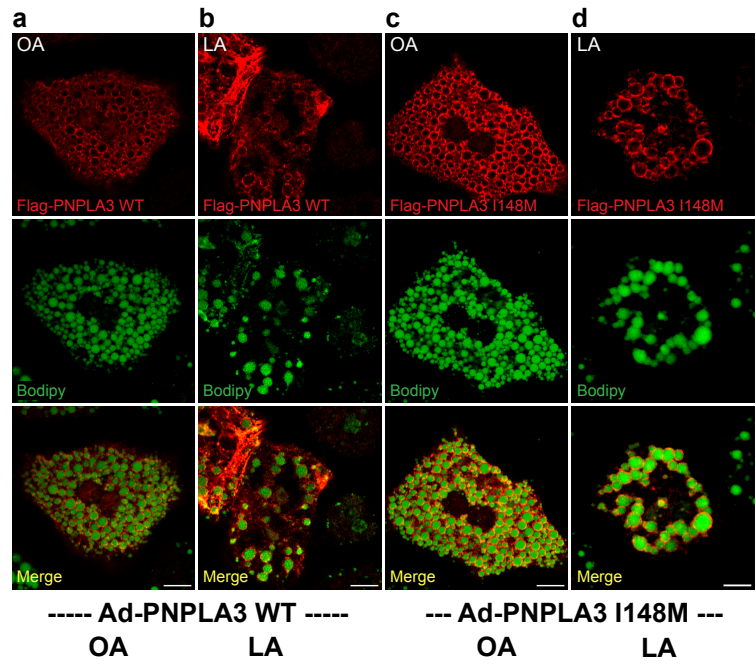

Supplementary Figure 1

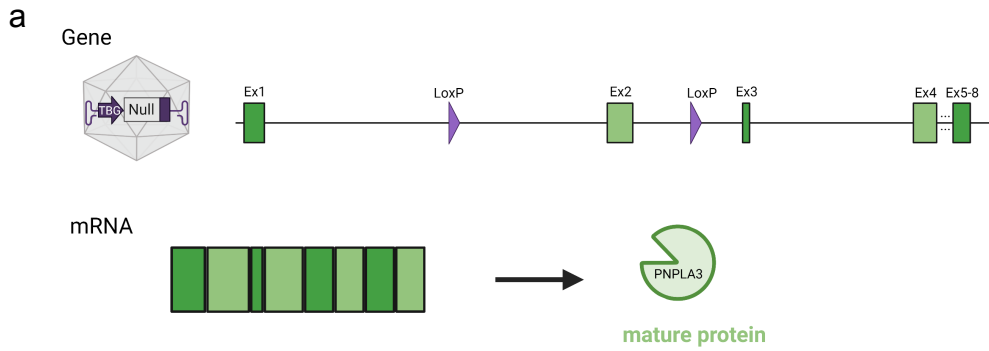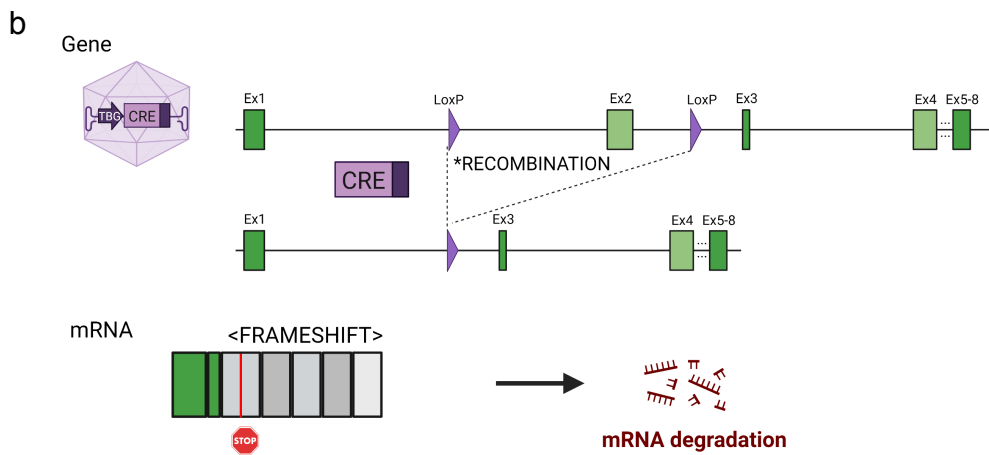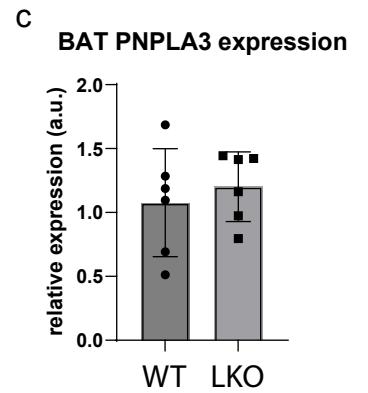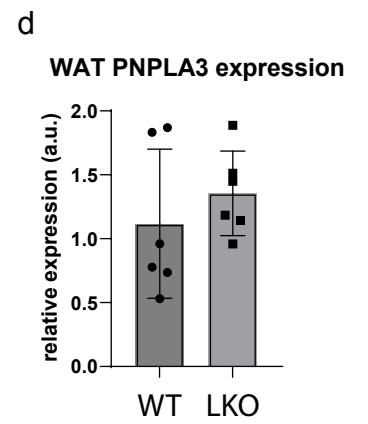

Supplementary Figure 2

**a**

### PNPLA3 Expression

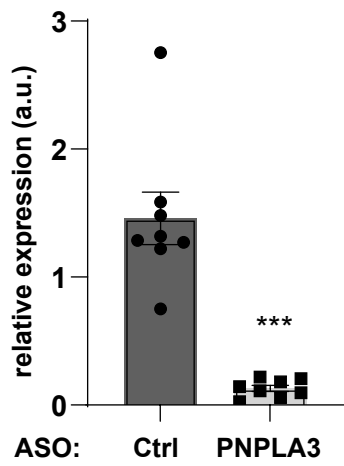

**b**

### Liver TG

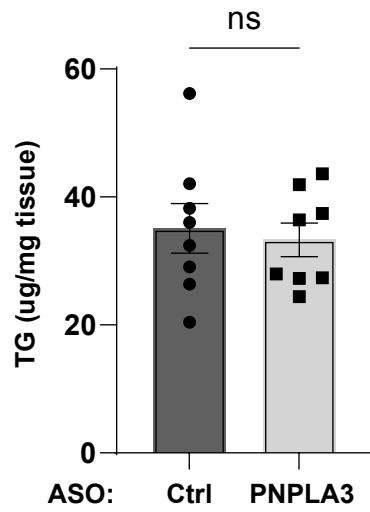

**c**

### Plasma TG

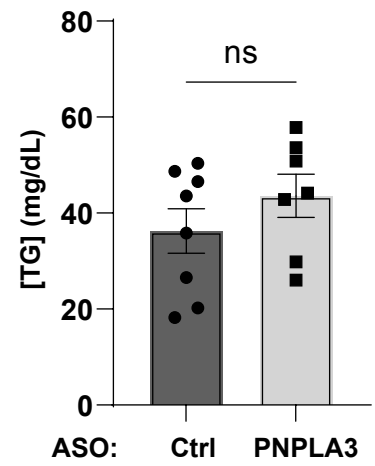

**Supplementary Figure 3**

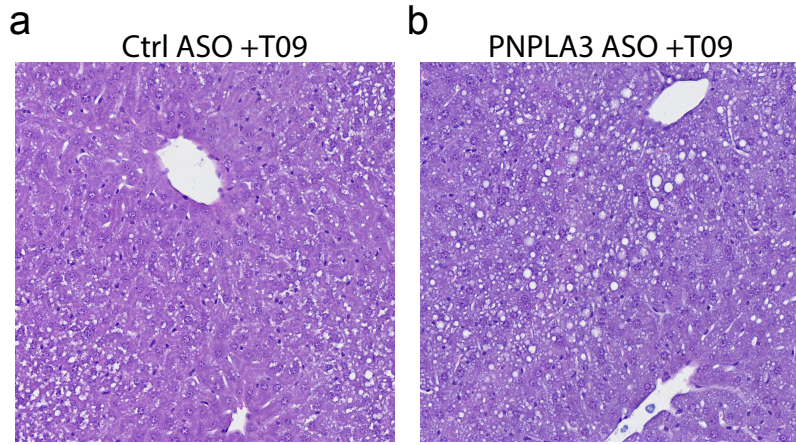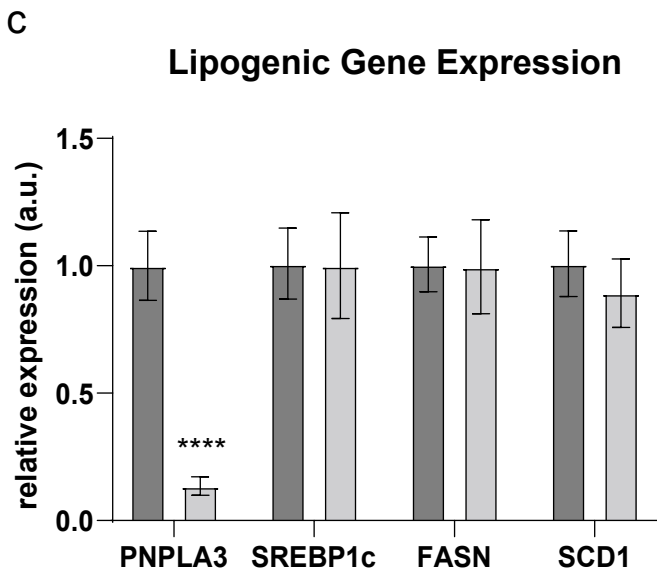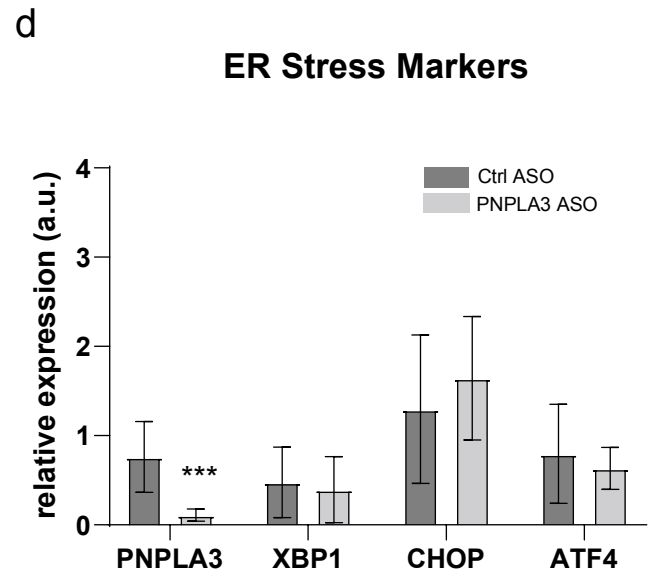

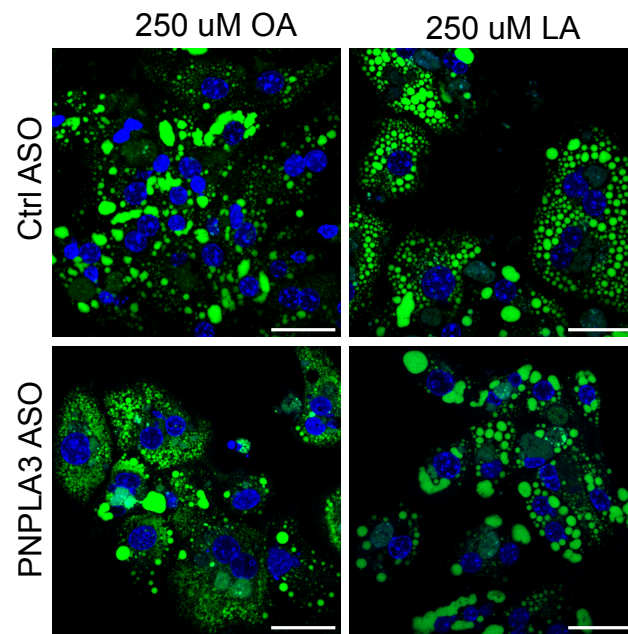

Supplementary Figure 5

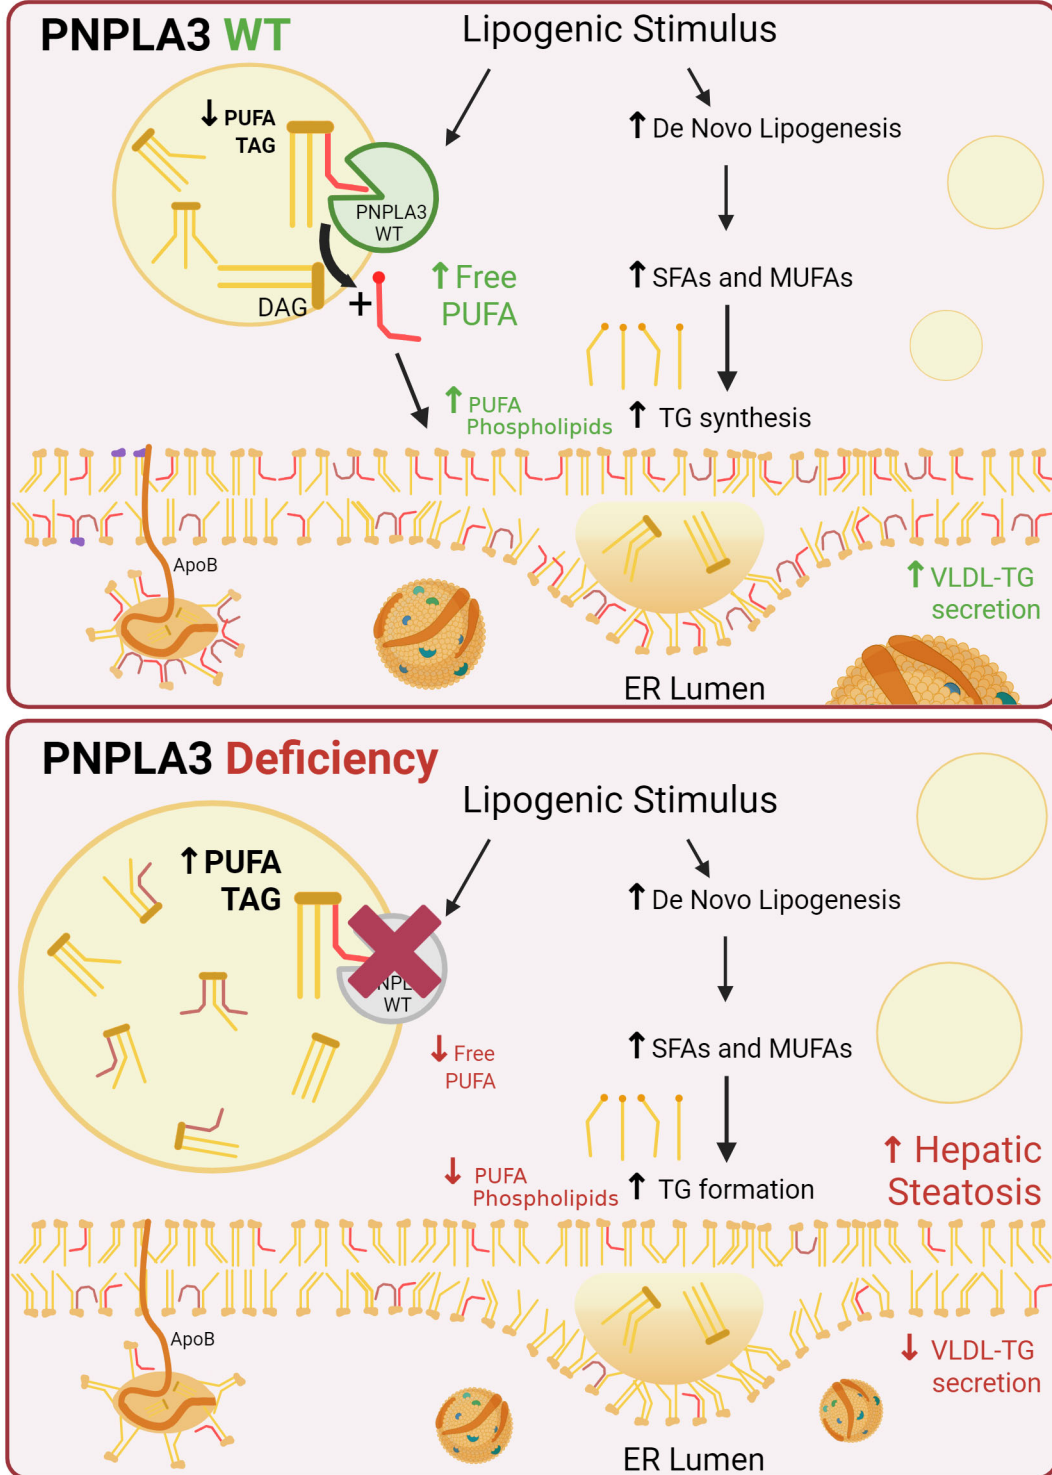

Supplementary Figure 6

## Supplementary Table S1

### Primer Sets for Genotyping

| Primer Name               | Sequence                   |
|---------------------------|----------------------------|
| ATGL KO_F                 | AGAGAGAGAAGCTGAAGCCTGG     |
| ATGL KO <sup>wt</sup> _R  | GCCAGCGAATGAGATGTTCC       |
| ATGL KO <sup>neo</sup> _R | CTGCGTGCAATCCATCTTGT       |
| PNPLA3 <sup>fl</sup> _F   | AGCTGCTAAGGTGCATTGCCA      |
| PNPLA3 <sup>fl</sup> _R   | CACTCTGCCCTAGCACTTATGACAAC |
| PNPLA3 <sup>ki</sup> _F   | TACACTGGCCTGGTCCCTTAATC    |
| PNPLA3 <sup>KI</sup> _R   | GCAGAGGCAAATGTTCTGTGAG     |



## Supplementary Table S2

### Primer sets for quantitative real-time PCR

| Primer Name | Sequence               |
|-------------|------------------------|
| PNPLA3_F    | ACGTGCTGGTGTCTGAGTTCC  |
| PNPLA3_R    | AGGGACGTTGTCGCTCACTC   |
| SREBP1_F    | GCAGACCCTGGTGAGTGG     |
| SREBP1_R    | GTCGGTGGATGGGCAGTTT    |
| ACC1_F      | CTTCCTGAGAAACGAGTCTGG  |
| ACC1_R      | CTGCCGAAACATCTCTGGGA   |
| SCD1_F      | CAAGCTGGAGTACGTCTGGA   |
| SCD1_R      | CAGAGCGCTGGTCATGTAGT   |
| FASN_F      | GAGGACACTCAAGTGGCTGA   |
| FASN_R      | GTGAGGTTGCTGTCGTCTGT   |
| ACLY_F      | GCCCTGGAAGTGGAGAAGAT   |
| ACLY_R      | CCGTCCACATTCAGGATAAGA  |
| ChREBP_F    | GGCCTGGCTGGAACAGTA     |
| ChREBP_R    | CGAAGGGAATTCAGGACAGT   |
| CHOP_F      | GTCCAGCTGGGAGCTGGAAG   |
| CHOP_R      | CTGACTGGAATCTGGAGAG    |
| ATF4_F      | AGCAAAACAAGACAGCAGCC   |
| ATF4_R      | ACTCTCTTCTCCCCCTTGC    |
| XBP1s_F     | GAGTCCGCAGCAGGTG       |
| XBP1s_R     | GTGTCAGAGTCCATGGGA     |
| Actin_F     | GGCTGTATTCCCCTCCATCG   |
| Actin_R     | CCAGTTGGTAACAATGCCATGT |

**Supplementary Table S3****Nutritional composition of corn-oil enriched Western diet (COWD) (D21050712i, Research Diets, New Brunswick, NJ)**

| <b>Class description</b> | <b>Ingredients</b>                         | <b>Grams</b> |
|--------------------------|--------------------------------------------|--------------|
| Protein                  | Casein, Lactic, 30 Mesh                    | 195.00 g     |
| Protein                  | Methionine, DL                             | 3.00 g       |
| Carbohydrate             | Sucrose, Fine Granulated                   | 350.00 g     |
| Carbohydrate             | Lodex 10                                   | 100.00 g     |
| Carbohydrate             | Starch, Corn                               | 50.00 g      |
| Fiber                    | Solka Floc, FCC200                         | 50.00 g      |
| Fat                      | Corn Oil                                   | 210.00 g     |
| Mineral                  | RD Mineral Mix ( <a href="#">S10001A</a> ) | 17.50 g      |
| Mineral                  | Calcium Phosphate, Dibasic                 | 17.50 g      |
| Mineral                  | Calcium Carbonate, Light, USP              | 4.00 g       |
| Vitamin                  | Choline Bitartrate                         | 2.00 g       |
| Vitamin                  | RD Vitamin Mix ( <a href="#">V10001C</a> ) | 1.00 g       |
| Anti-oxidant             | Ethoxyquin                                 | 0.04 g       |
| Special                  | Cholesterol, NF                            | 1.50 g       |
|                          | Total:                                     | 1001.54 g    |
